# Supplementary material for: Perioperatively Inhaled Hydrogen Gas Diminishes Neurologic Injury Following Experimental Circulatory Arrest in Swine
Source: PubMed Central journal article supplement — JACC Basic Transl Sci. 2019 Mar 27;4(2):176–87. doi: 10.1016/j.jacbts.2018.11.006 (PMC6488769; doi:10.1016/j.jacbts.2018.11.006), 2019-03-27
Supplement: mmc1.pdf [file mmc1.pdf]

## Online Figures

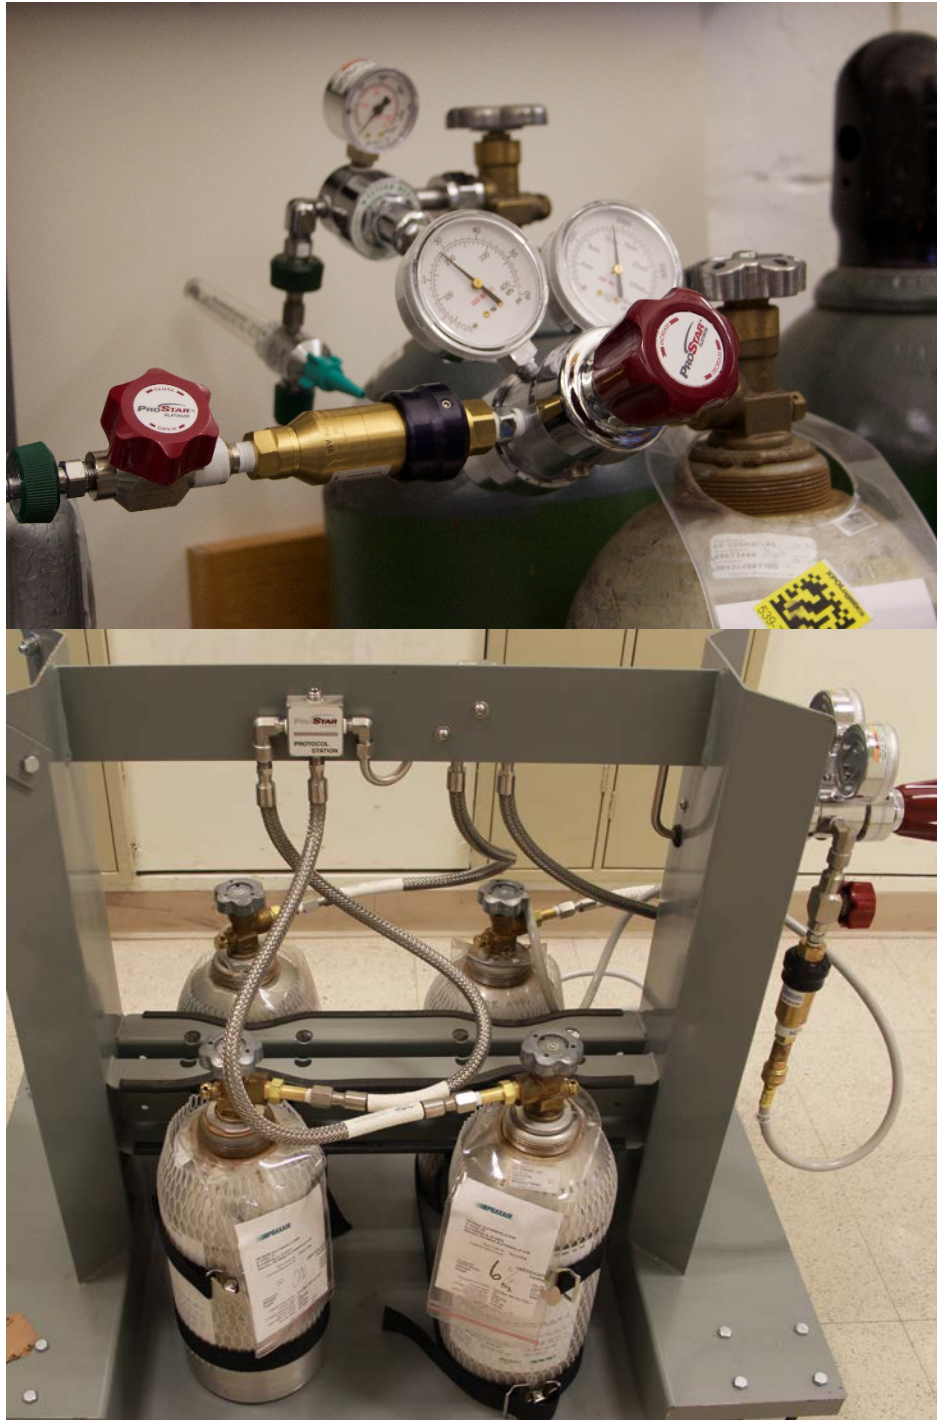

**Supplemental Figure S1.** (A) Certified, non-flammable mixtures of 2.40% hydrogen gas mixed in either medical air or oxygen were used for this experiment. These tanks were attached to a gas regulator (High Purity 2012 Series regulator by ProStar Platinum, part number PRS20122301)

set to 50 PSI, followed by a flash arrestor and check valve (SGD, Inc, model 8491-F), then directly to the oxygen and air inlet (respectively) of the ventilator or anesthesia machine. **(B)** Hydrogen-oxygen-carbon dioxide mixtures were also obtained with 0, 4, 6, and 8% carbon dioxide for perfusion under deep hypothermia using a pH stat strategy.

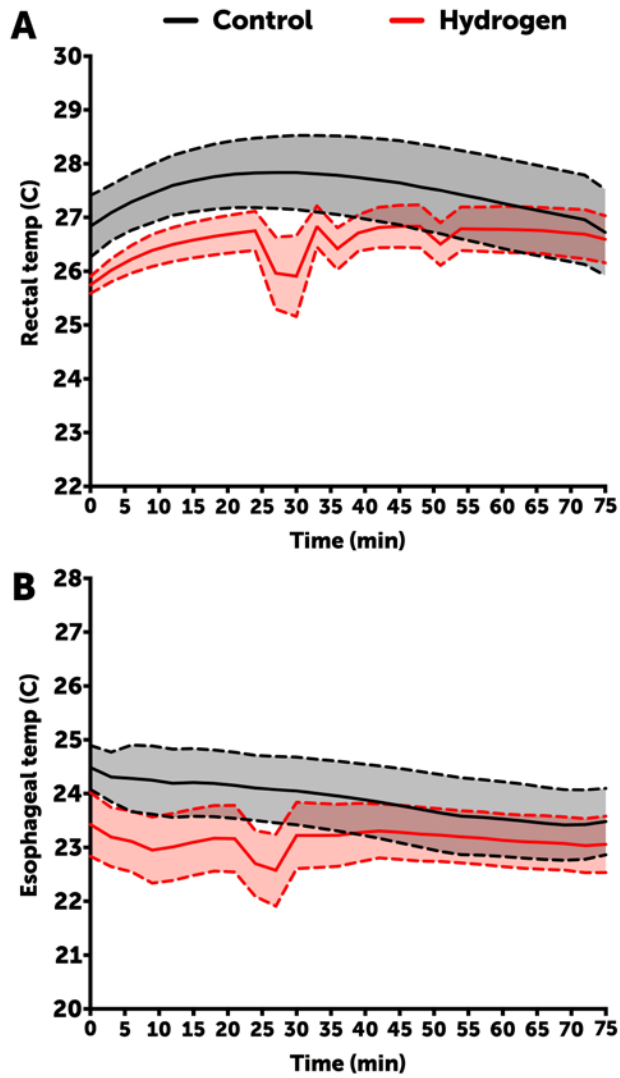

**Supplemental Figure S2.** There were no significant differences in rectal (**A**,  $P=0.2367$ , 2 way repeated measures ANOVA) or esophageal (**B**,  $P= 0.3541$ ) temperatures throughout the duration of DHCA.

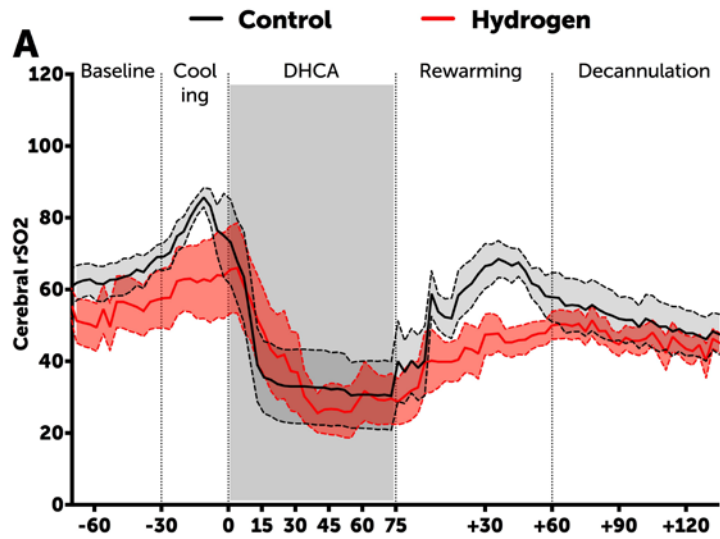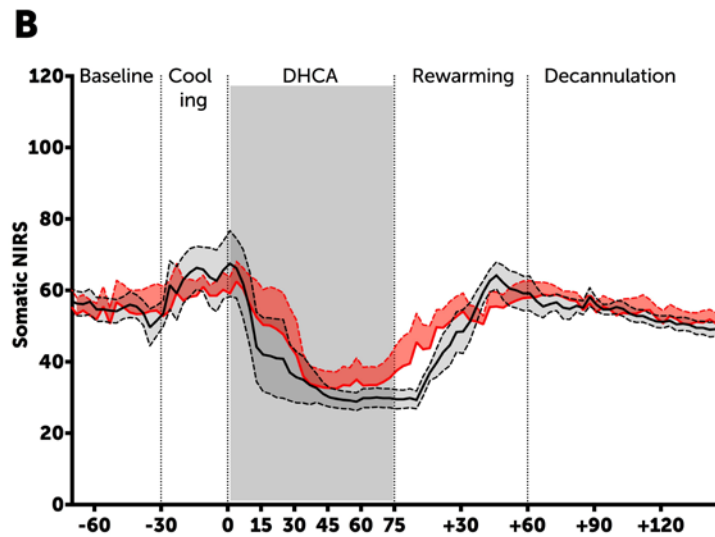

**Supplemental Figure S3.** There were no significant differences in cerebral (C,  $P=0.2079$ ) or somatic (D,  $P=0.8484$ ) near infrared spectroscopy (NIRS) values between groups. For **A-D**, data are means, error is SEM.

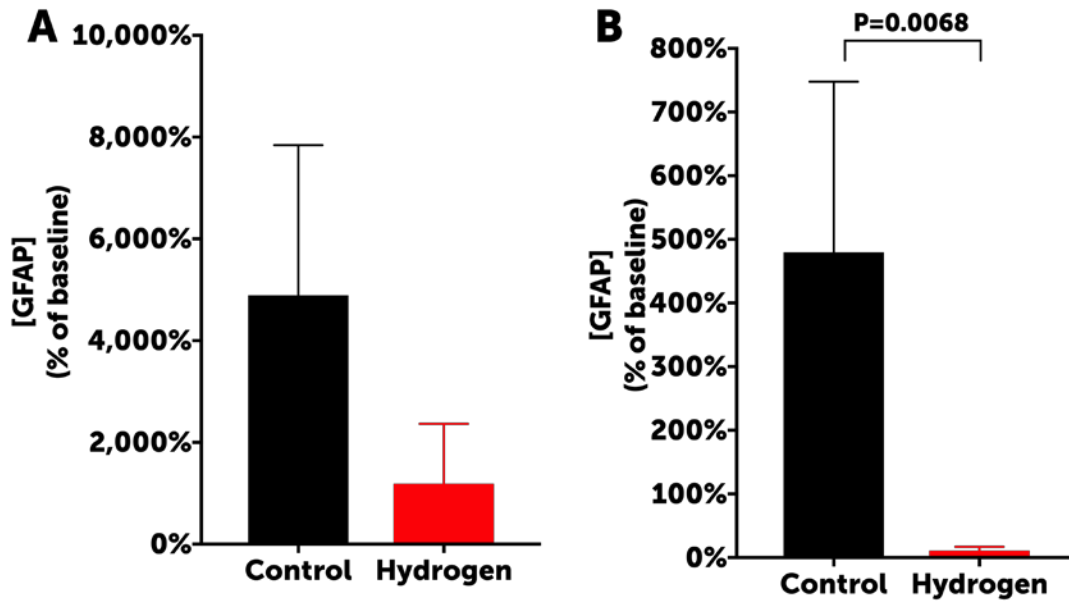

**Supplemental Figure S4.** The change from baseline concentration of glial fibrillary acidic protein ([GFAP], an acute serum marker of neuronal injury) at 30 (**A**,  $P=0.06$ ) and 60 (**B**,  $P=0.0068$ ) minutes post-bypass. Groups compared by Mann-Whitney test. Data shown are means, error is SEM.

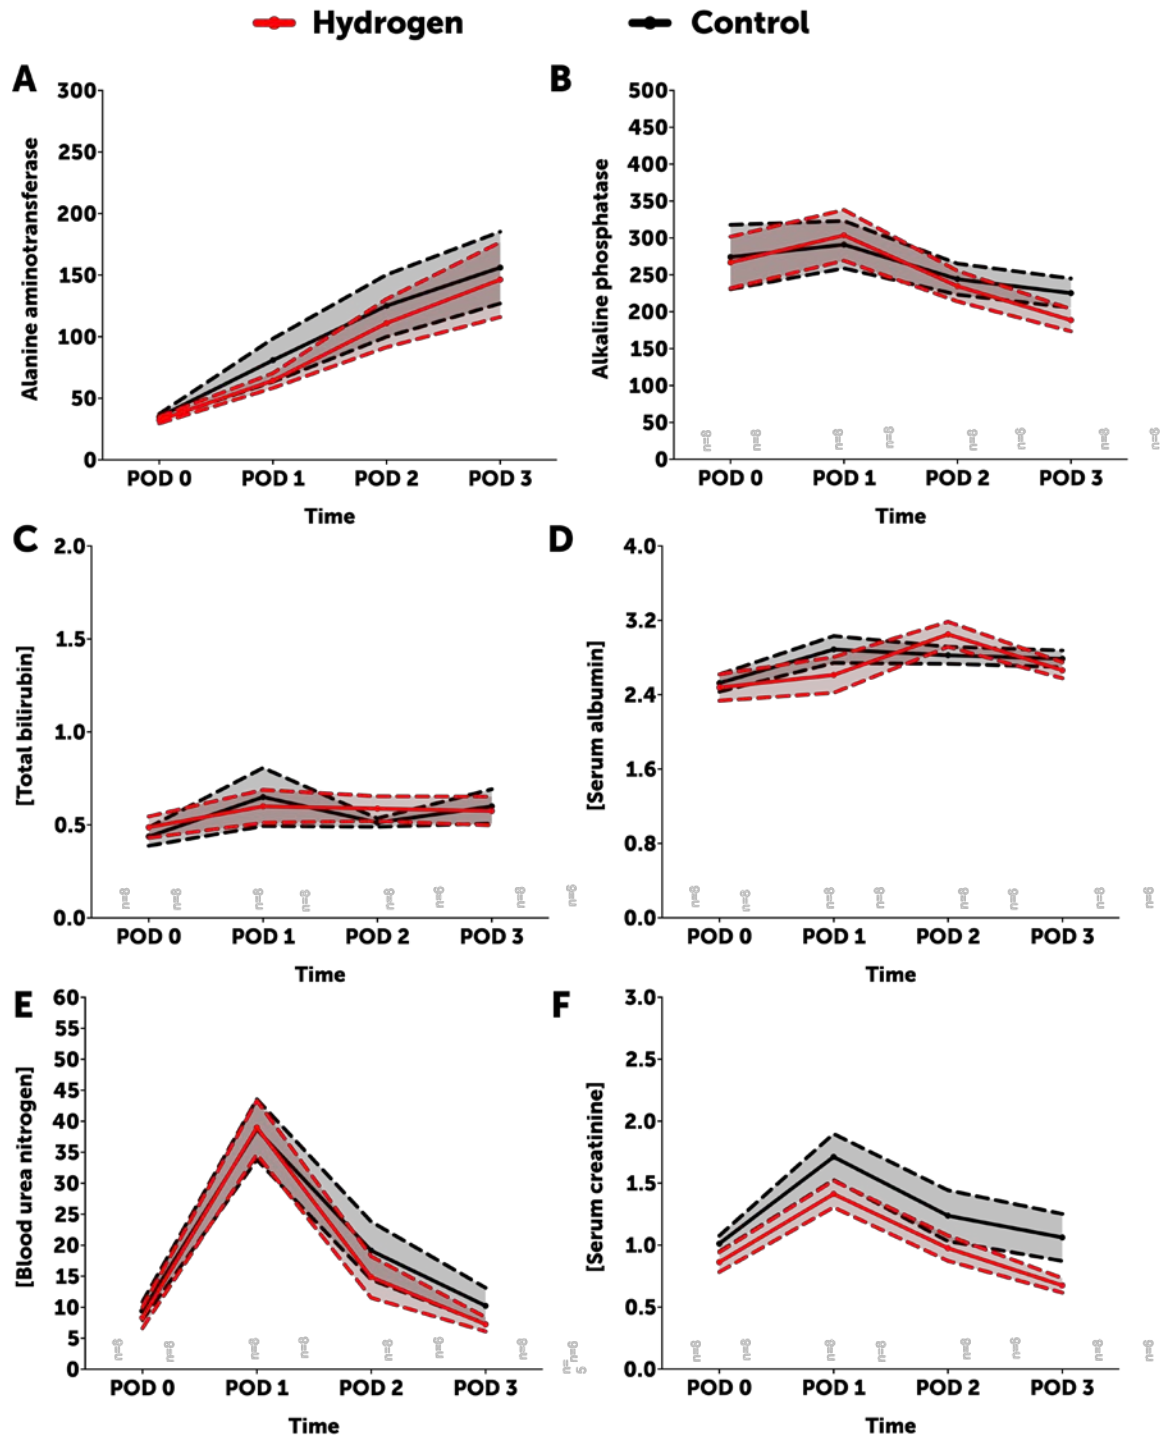

**Supplemental Figure S5.** There were no significant differences between groups in alanine aminotransferase (A,  $P=0.56$ ), alkaline phosphatase (B,  $P=0.75$ ), total bilirubin (C,  $P=0.88$ ), serum albumin (D,  $P=0.57$ ), or blood urea nitrogen concentration (E,  $P=0.52$ ).  $H_2$ -treated swine

exhibited a significantly lower serum creatinine over time (**F**,  $P=0.0152$ ). For A-F, data are means, error are SEM, groups compared over time by repeated measures 2-way ANOVA.

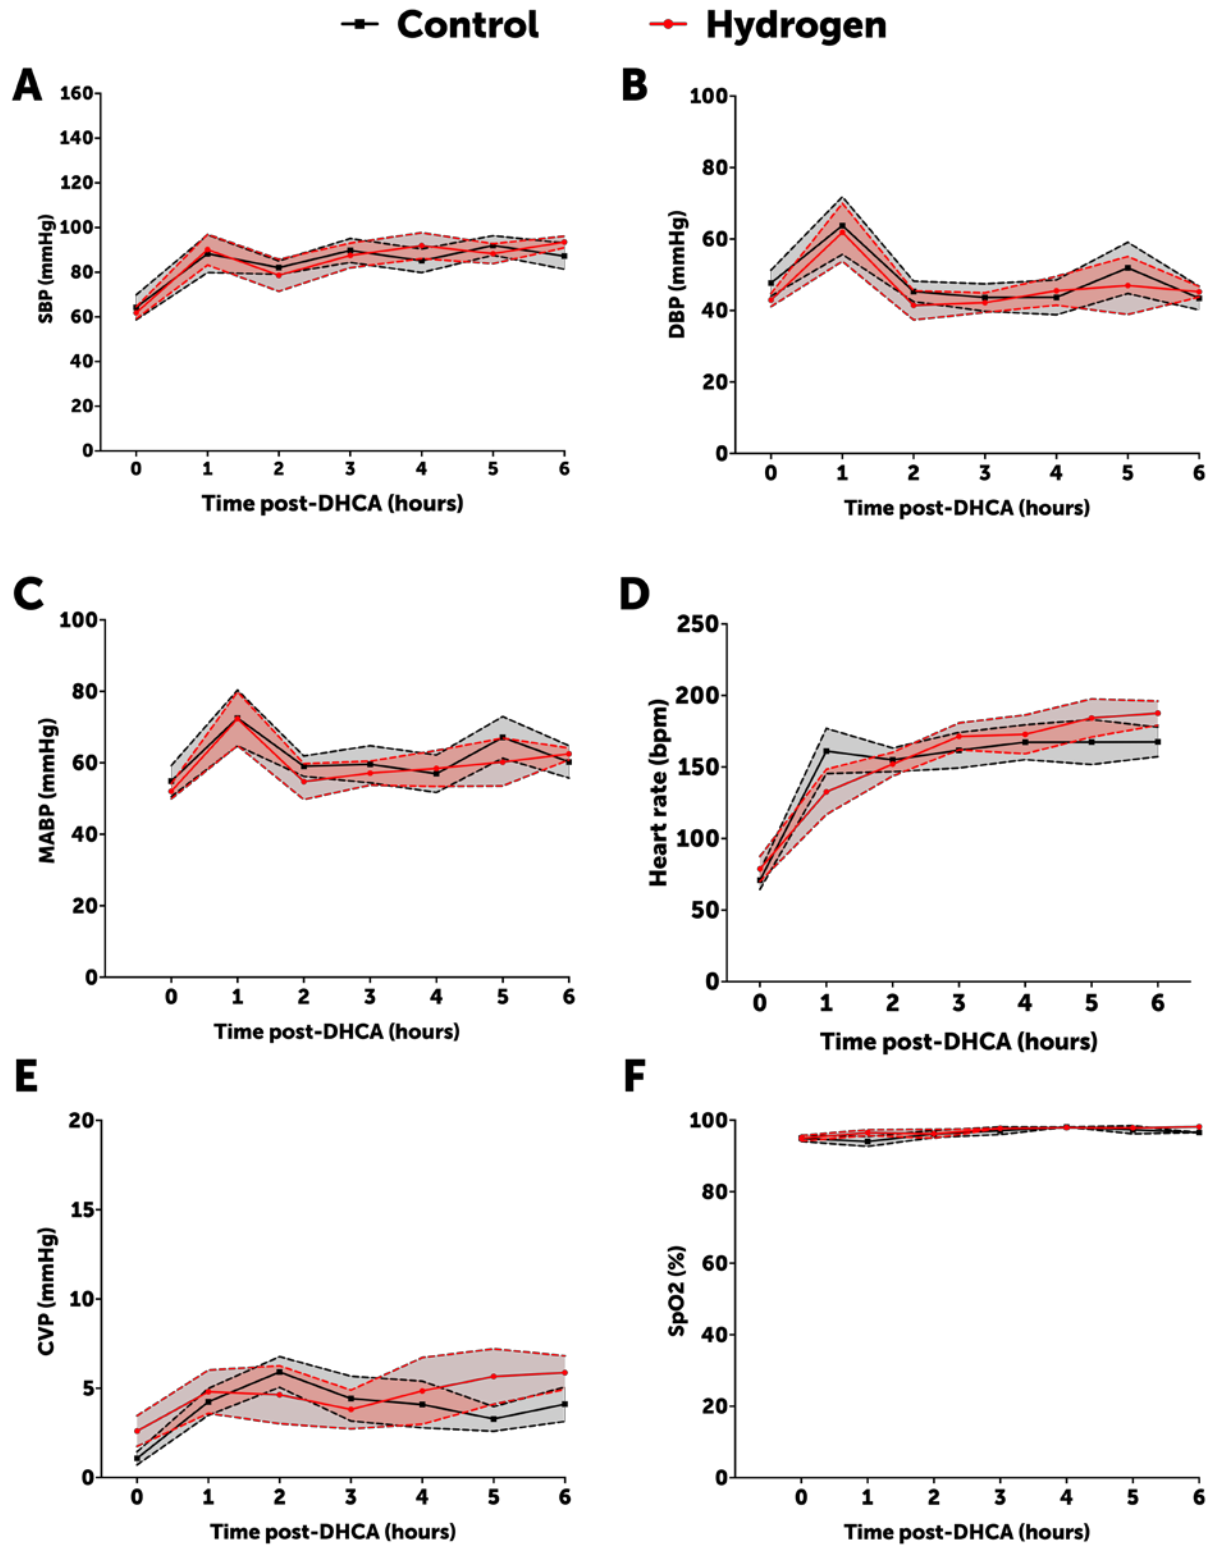



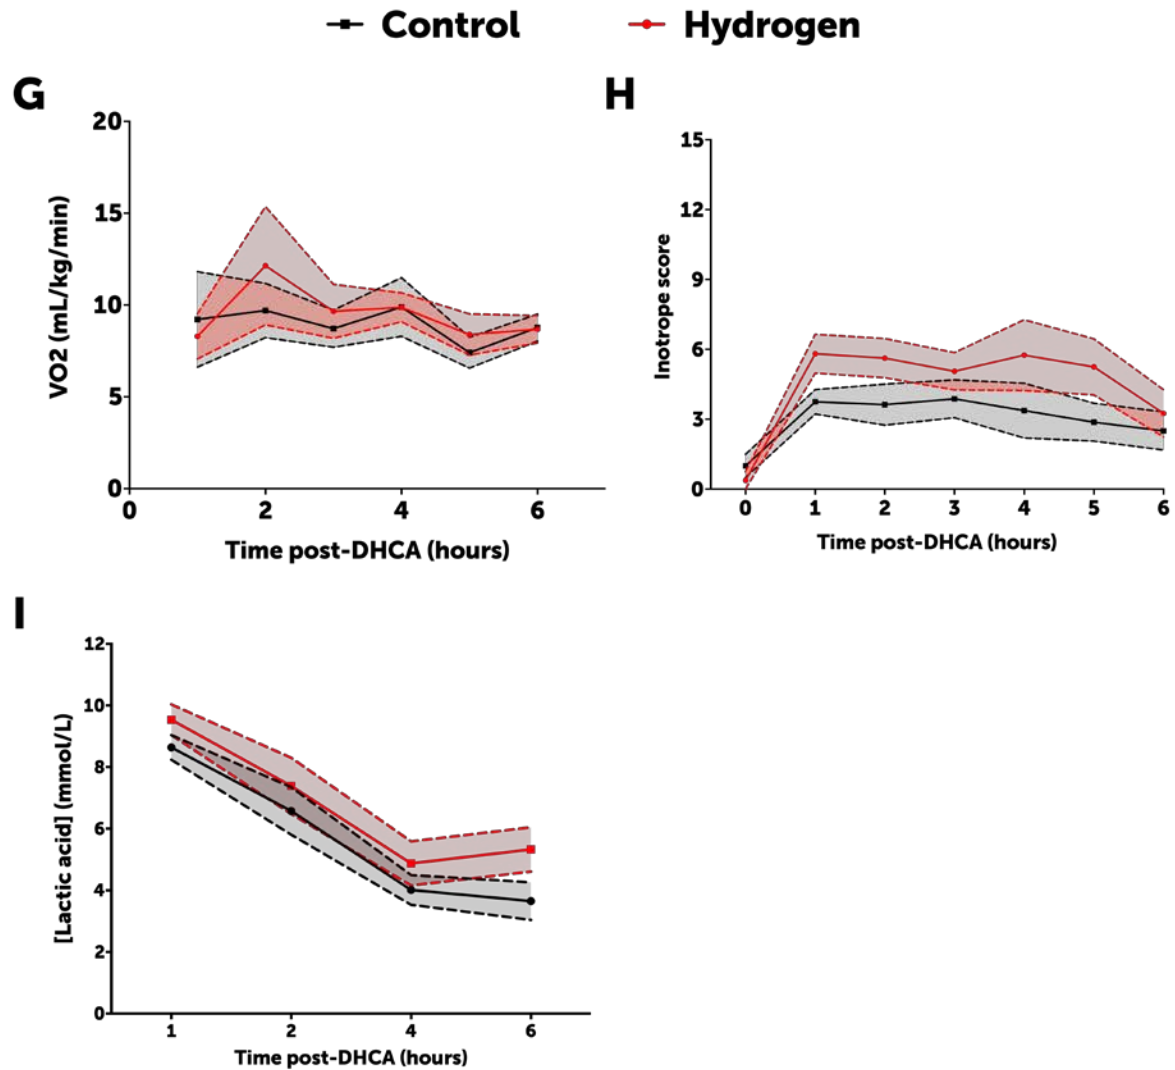

**Supplemental Figure S6.** There were no significant differences between groups in systolic (**A**,  $P=0.92$ ), diastolic (**B**,  $P=0.56$ ), or mean arterial blood pressure (**C**,  $P=0.61$ ), heart rate (**D**,  $P=0.73$ ), central venous pressure (**E**,  $P=0.57$ ), pulse oximetry (SpO<sub>2</sub>, **F**,  $P=0.23$ ), oxygen consumption (**G**,  $P=0.63$ ), inotrope score (**H**,  $P=0.18$ ), or in serum lactic acid concentration (**I**,  $P=0.16$ ) in the first 6 hours postoperatively. For A-I, data are means, error are SEM, groups compared over time by repeated measures 2-way ANOVA.

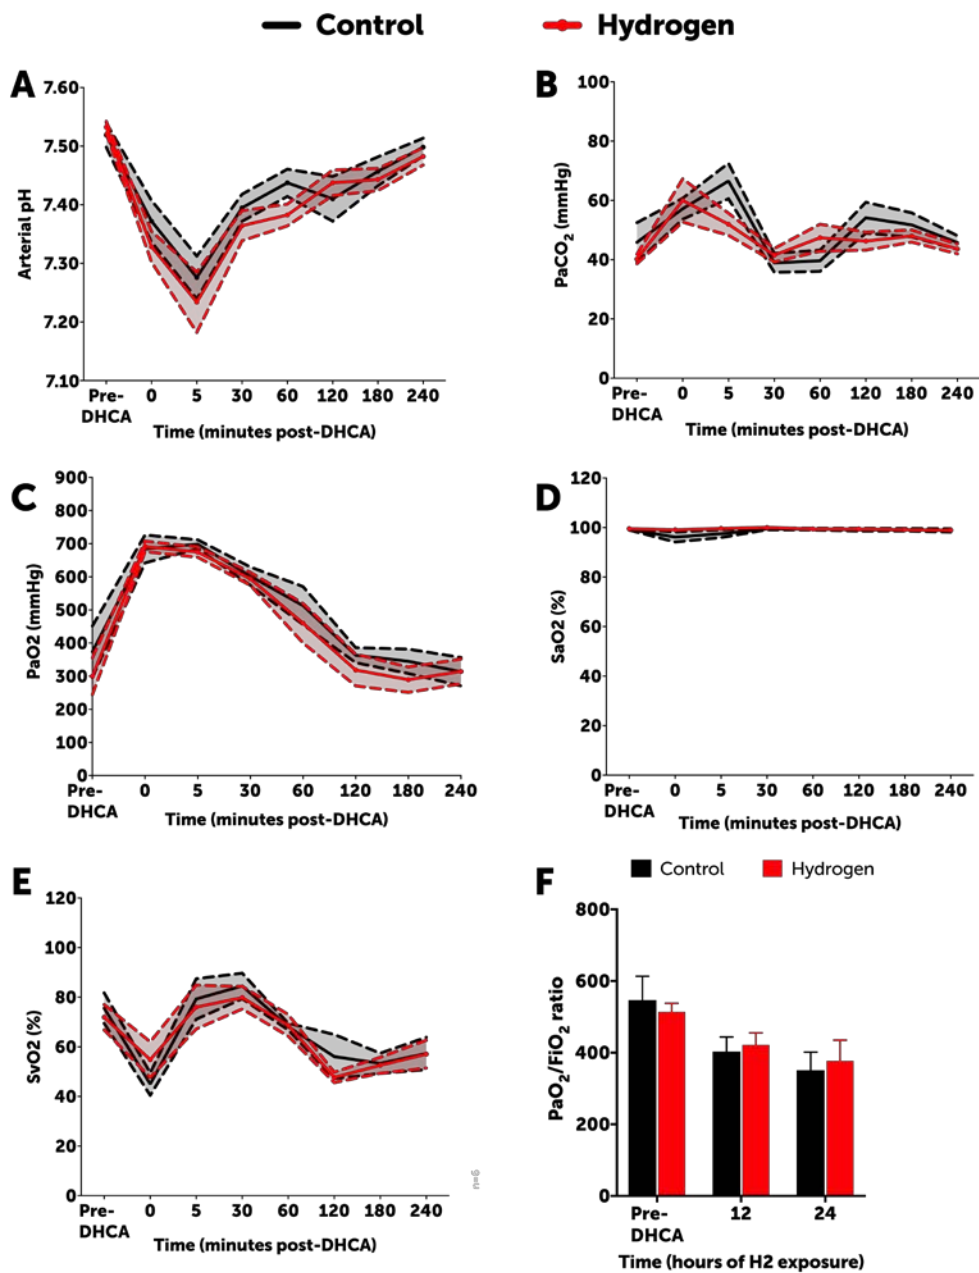

**Supplemental Figure S7.** There were no significant differences between groups in arterial pH (A,  $P=0.23$ ), arterial tension of carbon dioxide (B, PaCO<sub>2</sub>,  $P=0.21$ ), or arterial oxygen tension (C, PaO<sub>2</sub>,  $P=0.24$ ), arterial oxyhemoglobin saturation (D, SaO<sub>2</sub>,  $P=0.30$ ), venous oxyhemoglobin saturation (E, SvO<sub>2</sub>,  $P=0.75$ ) in the first 6 hours postoperatively. There was also no difference in the ratio between arterial oxygen tension and inspired oxygen fraction (F, PaO<sub>2</sub>/FiO<sub>2</sub> ratio,

P=0.91) For A-F, data are means, error are SEM, groups compared over time by repeated measures 2-way ANOVA.

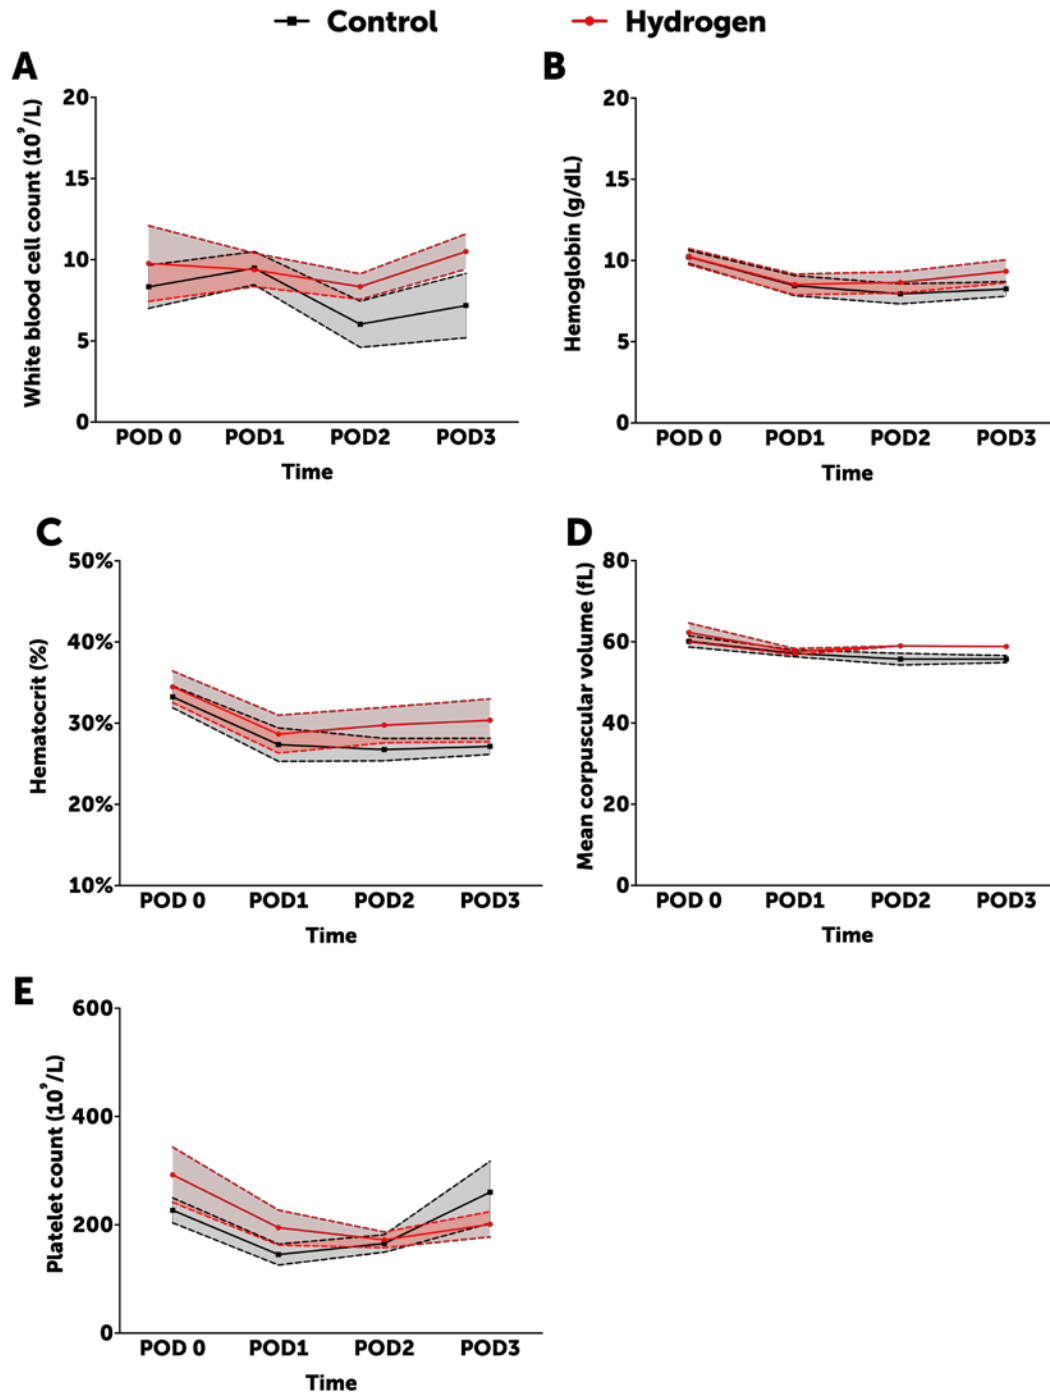

**Online Figure 8.** There were no significant differences between groups in white blood cell count (A,  $P=0.32$ ), hemoglobin (B,  $P=0.46$ ), hematocrit (C,  $P=0.34$ ), mean corpuscular volume

(**D**,  $P=0.11$ ), or platelet count (**E**,  $P=0.69$ ). For A-E, data are means, error are SEM, groups compared over time by repeated measures 2 way ANOVA.

**Supplemental Table**

| Behavior                                        | Laterality | Normal | Weak | Absent |
|-------------------------------------------------|------------|--------|------|--------|
| <b>Cranial nerve examination</b>                |            |        |      |        |
| Pupil size                                      | Right      | 0      | 2    | 5      |
|                                                 | Left       | 0      | 2    | 5      |
| Light reflex                                    | Right      | 0      | 2    | 5      |
|                                                 | Left       | 0      | 2    | 5      |
| Eye position                                    | Right      | 0      | 2    | 5      |
|                                                 | Left       | 0      | 2    | 5      |
| Lid reflex                                      | Right      | 0      | 2    | 5      |
|                                                 | Left       | 0      | 2    | 5      |
| Corneal reflex                                  | Right      | 0      | 2    | 5      |
|                                                 | Left       | 0      | 2    | 5      |
| Cilio-spinal reflex                             | Right      | 0      | 2    | 5      |
|                                                 | Left       | 0      | 2    | 5      |
| Oculocephalic reflex                            |            | 0      | 2    | 5      |
| Auditory reflex                                 |            | 0      | 2    | 10     |
| Gag reflex                                      |            | 0      | 5    | 10     |
| Carinal reflex                                  |            | 0      | 5    | 15     |
| <b>Respiratory Pattern</b>                      |            |        |      |        |
| Normal                                          |            |        |      | 0      |
| Hyperventilation                                |            |        |      | 25     |
| Abnormal spontaneous breathing (e.g. irregular) |            |        |      | 50     |
| Apnea                                           |            |        |      | 100    |
| <b>Motor and Sensory Function</b>               |            |        |      |        |
| Stretch reflex                                  |            | 0      | 10   | 25     |
| Motor response to pain                          |            | 0      | 10   | 25     |
| Positioning                                     |            | 0      | 10   | 25     |
| Muscle tone                                     |            | 0      | 10   | 25     |
| <b>Level of consciousness</b>                   |            |        |      |        |
| Normal                                          |            |        |      | 0      |
| Cloudy                                          |            |        |      | 30     |
| Delirium                                        |            |        |      | 45     |
| Stupor                                          |            |        |      | 60     |
| Coma                                            |            |        |      | 100    |
| <b>Behavior</b>                                 |            |        |      |        |
| Drinking                                        |            | 0      |      | 15     |
| Chewing                                         |            | 0      |      | 15     |
| Sitting                                         |            | 0      |      | 15     |
| Standing                                        |            | 0      |      | 15     |

|                                                                          |   |    |    |
|--------------------------------------------------------------------------|---|----|----|
| Walking                                                                  | 0 | 20 | 40 |
| <b>Total possible score (worst score) = 500; normal (best score) = 0</b> |   |    |    |

**Online Table 1.** Details of the swine neurologic deficit score. The oculocephalic and ciliospinal reflexes were not performed in any animals.
